# Supplementary material for: The Promising B−Type Response Regulator hst1 Gene Provides Multiple High Temperature and Drought Stress Tolerance in Rice
Source: MDPI journal article supplement (doi:10.3390/ijms25042385), 2024-02-17
Supplement: s1 [file s1]

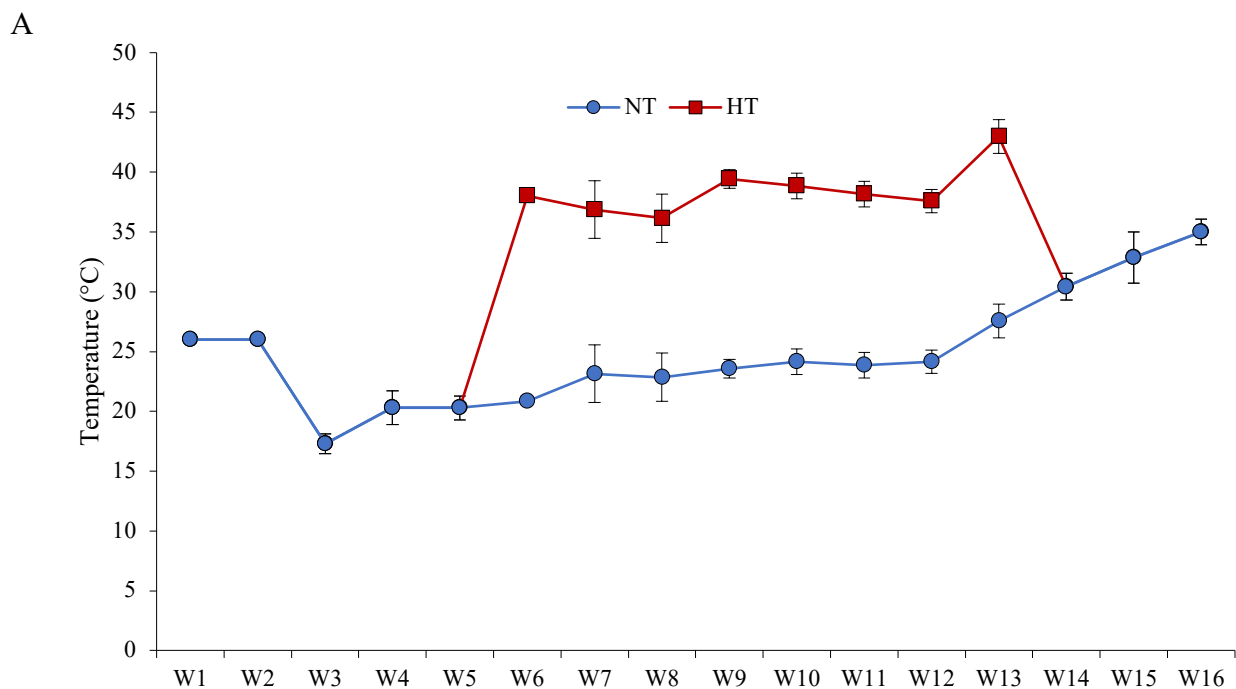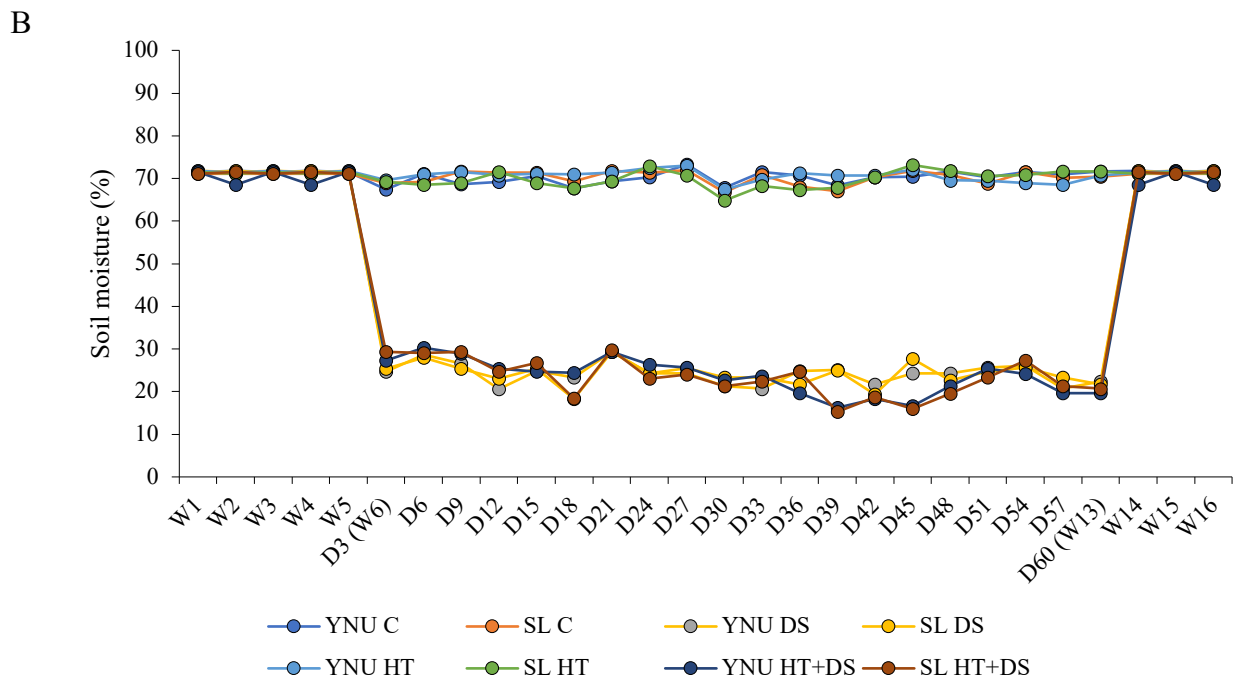

**Figure S2.** The greenhouse condition and drought application at the reproductive stage. **(A)** greenhouse temperature, **(B)** soil moisture percentage measurements.
