# Supplementary material for: The Promising B−Type Response Regulator hst1 Gene Provides Multiple High Temperature and Drought Stress Tolerance in Rice
Source: MDPI journal article supplement (doi:10.3390/ijms25042385), 2024-02-17
Supplement: s1 [file s1]

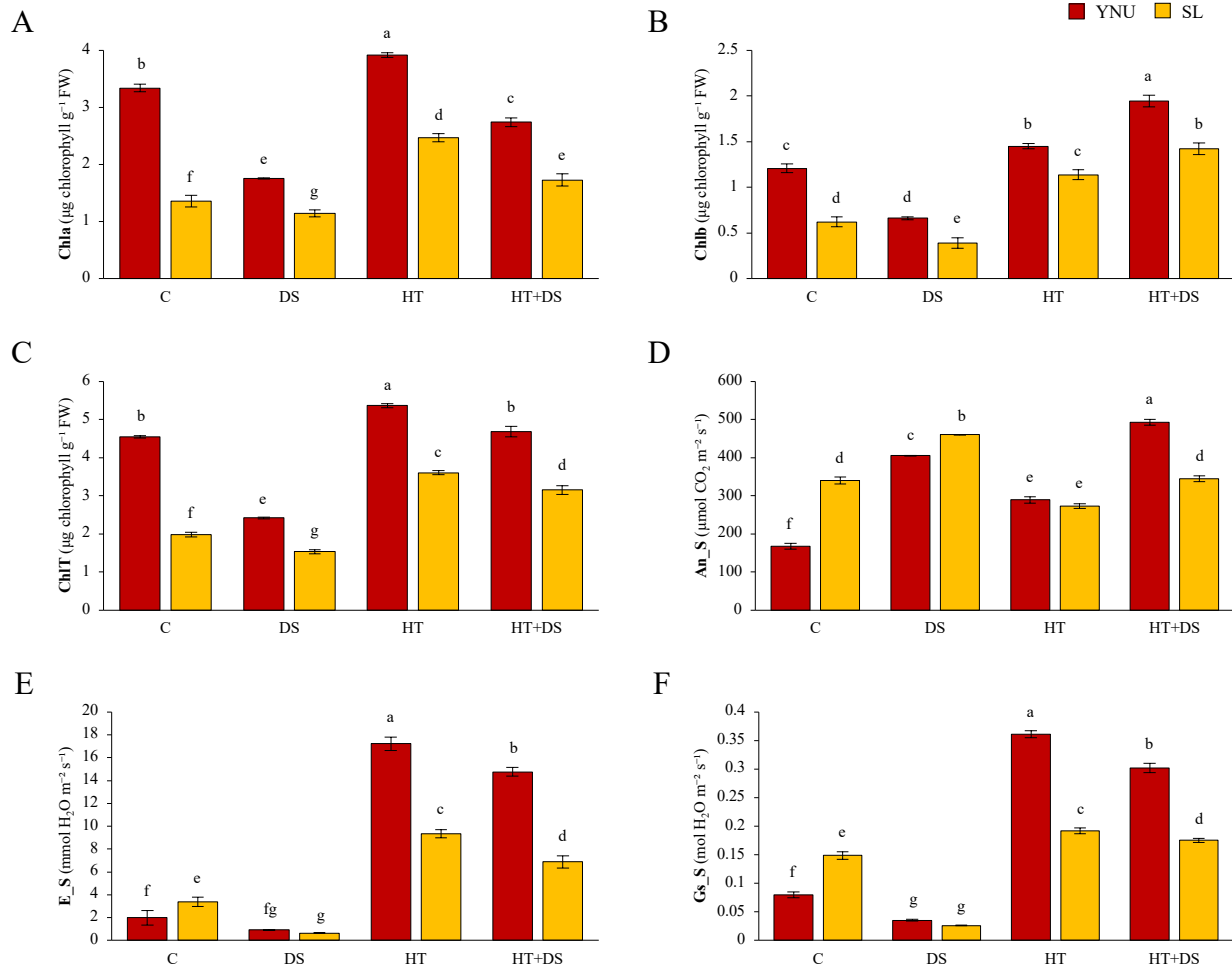

**Figure S5.** The effect of stresses on the chlorophyll and photosynthesis traits of YNU and SL genotypes at the seedling stage. **(A)** chlorophyll a (Chla), **(B)** chlorophyll b (Chlb), **(C)** total chlorophyll (ChlT) content, **(D)** the net photosynthesis rate ( $\text{An}_S$ ), **(E)** transpiration rate ( $\text{E}_S$ ), **(F)** stomatal conductance ( $\text{Gs}$ ) of control (C; 26/23 °C + 0% PEG), drought (DS; 26/23 °C + 15% PEG), high temperature (HT; 35/32 °C + 0% PEG), and high temperature + drought (HT+DS; 35/32 °C + 15% PEG) stress exposed YNU and SL genotypes. Means ( $\pm$  standard deviation) within the same graph followed by different letters are significantly different at  $p < 0.05$  according to the Tukey HSD test from three independent biological replicates ( $n=3$ ).
