# Supplementary material for: The Promising B−Type Response Regulator hst1 Gene Provides Multiple High Temperature and Drought Stress Tolerance in Rice
Source: MDPI journal article supplement (doi:10.3390/ijms25042385), 2024-02-17
Supplement: s1 [file s1]

A

## Seedling Stage

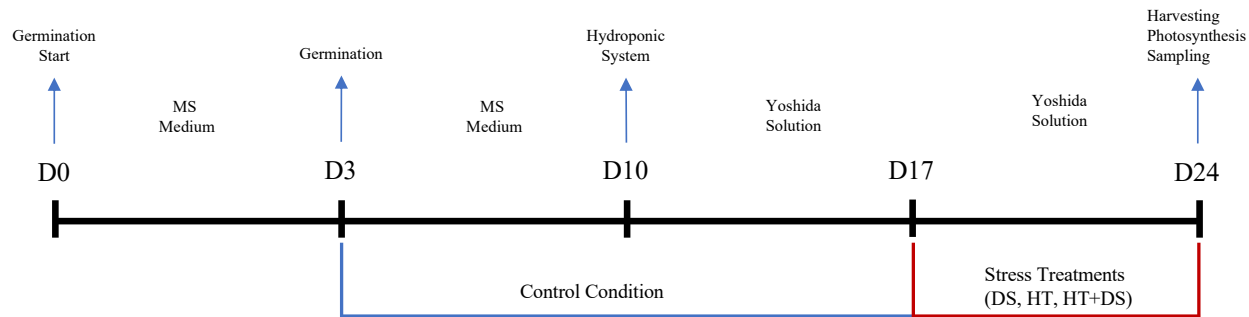

B

## Reproductive Stage

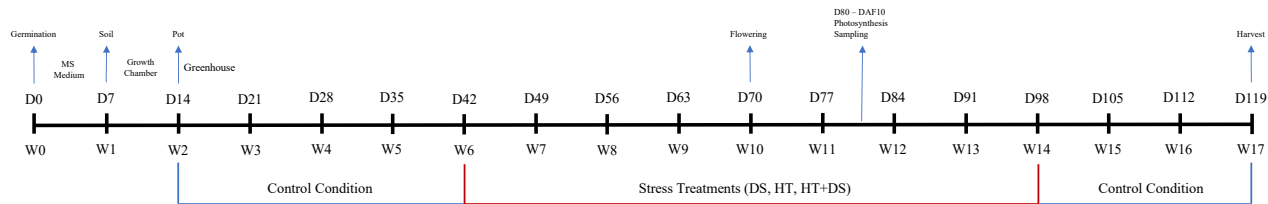

**Figure S1.** The experimental design time line. **(A)** seedling stage, **(B)** reproductive stage.
