# Supplementary material for: The Promising B−Type Response Regulator hst1 Gene Provides Multiple High Temperature and Drought Stress Tolerance in Rice
Source: MDPI journal article supplement (doi:10.3390/ijms25042385), 2024-02-17
Supplement: s1 [file s1]

**Table S3.** Loading values and percentage contribution of variables on the axis identified by the principal component analysis (PCA) for all comparisons

| Variables              | Dim1           |                              |                     | Dim2           |                              |                     | Dim3           |                              |                     |
|------------------------|----------------|------------------------------|---------------------|----------------|------------------------------|---------------------|----------------|------------------------------|---------------------|
|                        | Loading values | Contribution of variable (%) | Quality of variable | Loading values | Contribution of variable (%) | Quality of variable | Loading values | Contribution of variable (%) | Quality of variable |
| SL                     | -0.831         | 3.566                        | 0.690               | -0.044         | 0.021                        | 0.002               | 0.051          | 0.056                        | 0.003               |
| RL                     | -0.700         | 2.533                        | 0.490               | -0.495         | 2.646                        | 0.245               | 0.407          | 3.573                        | 0.166               |
| SFW                    | -0.839         | 3.635                        | 0.703               | 0.049          | 0.026                        | 0.002               | -0.092         | 0.182                        | 0.008               |
| RFW                    | -0.608         | 1.910                        | 0.370               | -0.214         | 0.493                        | 0.046               | -0.191         | 0.787                        | 0.036               |
| SDW                    | -0.770         | 3.061                        | 0.592               | -0.091         | 0.089                        | 0.008               | 0.108          | 0.253                        | 0.012               |
| RDW                    | -0.611         | 1.932                        | 0.374               | 0.294          | 0.933                        | 0.086               | 0.557          | 6.691                        | 0.310               |
| RWC                    | -0.878         | 3.979                        | 0.770               | -0.067         | 0.048                        | 0.004               | 0.037          | 0.030                        | 0.001               |
| An                     | 0.494          | 1.262                        | 0.244               | -0.363         | 1.421                        | 0.132               | -0.303         | 1.986                        | 0.092               |
| E                      | 0.157          | 0.127                        | 0.025               | 0.903          | 8.811                        | 0.816               | -0.179         | 0.689                        | 0.032               |
| Gs                     | 0.093          | 0.045                        | 0.009               | 0.894          | 8.628                        | 0.799               | -0.113         | 0.274                        | 0.013               |
| Chla                   | -0.385         | 0.768                        | 0.149               | 0.825          | 7.339                        | 0.680               | 0.064          | 0.088                        | 0.004               |
| Chlb                   | 0.220          | 0.249                        | 0.048               | 0.800          | 6.900                        | 0.639               | 0.394          | 3.349                        | 0.155               |
| ChIT                   | -0.192         | 0.190                        | 0.037               | 0.886          | 8.476                        | 0.785               | 0.193          | 0.802                        | 0.037               |
| MDA_S                  | 0.687          | 2.435                        | 0.471               | -0.542         | 3.175                        | 0.294               | 0.273          | 1.608                        | 0.075               |
| Pro_S                  | 0.056          | 0.016                        | 0.003               | 0.816          | 7.184                        | 0.666               | -0.206         | 0.914                        | 0.042               |
| SOD_S                  | 0.024          | 0.003                        | 0.001               | -0.509         | 2.797                        | 0.259               | -0.293         | 1.847                        | 0.086               |
| APX_S                  | -0.467         | 1.127                        | 0.218               | -0.302         | 0.987                        | 0.091               | 0.615          | 8.155                        | 0.378               |
| CAT_S                  | 0.661          | 2.255                        | 0.436               | 0.665          | 4.778                        | 0.443               | 0.000          | 0.000                        | 0.000               |
| H2O2_S                 | 0.657          | 2.233                        | 0.432               | -0.568         | 3.477                        | 0.322               | -0.444         | 4.258                        | 0.197               |
| PH_R                   | -0.658         | 2.238                        | 0.433               | 0.305          | 1.004                        | 0.093               | 0.477          | 4.919                        | 0.228               |
| PN                     | -0.615         | 1.954                        | 0.378               | 0.464          | 2.326                        | 0.215               | -0.227         | 1.115                        | 0.052               |
| RL_R                   | -0.727         | 2.728                        | 0.528               | -0.316         | 1.078                        | 0.100               | 0.234          | 1.182                        | 0.055               |
| RB_R                   | -0.809         | 3.379                        | 0.654               | 0.182          | 0.359                        | 0.033               | -0.159         | 0.545                        | 0.025               |
| PB_R                   | -0.903         | 4.217                        | 0.816               | -0.173         | 0.322                        | 0.030               | -0.290         | 1.816                        | 0.084               |
| PL                     | -0.900         | 4.190                        | 0.811               | -0.043         | 0.020                        | 0.002               | 0.226          | 1.103                        | 0.051               |
| SN                     | -0.852         | 3.753                        | 0.726               | -0.110         | 0.131                        | 0.012               | -0.177         | 0.674                        | 0.031               |
| GNPP                   | -0.651         | 2.189                        | 0.424               | -0.151         | 0.246                        | 0.023               | -0.541         | 6.309                        | 0.292               |
| YPP                    | -0.747         | 2.880                        | 0.557               | -0.469         | 2.371                        | 0.220               | -0.189         | 0.773                        | 0.036               |
| TGW                    | -0.679         | 2.381                        | 0.461               | -0.388         | 1.628                        | 0.151               | -0.426         | 3.908                        | 0.181               |
| MDA_R                  | 0.597          | 1.842                        | 0.356               | 0.372          | 1.496                        | 0.139               | -0.583         | 7.337                        | 0.340               |
| PRO_R                  | -0.622         | 1.999                        | 0.387               | 0.303          | 0.993                        | 0.092               | 0.018          | 0.007                        | 0.000               |
| SOD_R                  | 0.047          | 0.012                        | 0.002               | 0.034          | 0.013                        | 0.001               | 0.513          | 5.669                        | 0.263               |
| APX_R                  | -0.548         | 1.553                        | 0.301               | -0.457         | 2.257                        | 0.209               | 0.367          | 2.904                        | 0.135               |
| CAT_R                  | 0.600          | 1.859                        | 0.360               | 0.059          | 0.037                        | 0.003               | 0.437          | 4.118                        | 0.191               |
| H2O2_R                 | 0.478          | 1.182                        | 0.229               | 0.298          | 0.960                        | 0.089               | 0.457          | 4.513                        | 0.209               |
| An_R                   | 0.269          | 0.375                        | 0.073               | -0.082         | 0.072                        | 0.007               | 0.258          | 1.440                        | 0.067               |
| E_R                    | -0.004         | 0.000                        | 0.000               | -0.820         | 7.266                        | 0.673               | 0.227          | 1.108                        | 0.051               |
| Gs_R                   | 0.657          | 2.230                        | 0.432               | -0.098         | 0.103                        | 0.010               | 0.531          | 6.092                        | 0.282               |
| PG                     | -0.890         | 4.096                        | 0.793               | 0.324          | 1.131                        | 0.105               | 0.020          | 0.009                        | 0.000               |
| CG                     | 0.506          | 1.325                        | 0.256               | 0.518          | 2.892                        | 0.268               | -0.321         | 2.226                        | 0.103               |
| DiG                    | 0.888          | 4.070                        | 0.788               | -0.016         | 0.003                        | 0.000               | -0.275         | 1.636                        | 0.076               |
| DaG                    | 0.576          | 1.717                        | 0.332               | -0.498         | 2.677                        | 0.248               | -0.296         | 1.892                        | 0.088               |
| GWdt                   | -0.926         | 4.431                        | 0.858               | 0.067          | 0.048                        | 0.004               | -0.060         | 0.078                        | 0.004               |
| GL                     | -0.908         | 4.261                        | 0.825               | 0.048          | 0.025                        | 0.002               | -0.278         | 1.671                        | 0.077               |
| GTh                    | -0.873         | 3.939                        | 0.762               | 0.359          | 1.388                        | 0.129               | -0.194         | 0.811                        | 0.038               |
| Gsa                    | -0.866         | 3.873                        | 0.750               | 0.293          | 0.925                        | 0.086               | -0.167         | 0.600                        | 0.028               |
| <b>Eigenvalue</b>      |                | 19.353                       |                     |                | 9.264                        |                     |                | 4.634                        |                     |
| <b>Variability (%)</b> |                | 42.071                       |                     |                | 20.139                       |                     |                | 10.074                       |                     |
| <b>Cumulative (%)</b>  |                | 42.071                       |                     |                | 62.210                       |                     |                | 72.284                       |                     |
