# Supplementary material for: The Promising B−Type Response Regulator hst1 Gene Provides Multiple High Temperature and Drought Stress Tolerance in Rice
Source: MDPI journal article supplement (doi:10.3390/ijms25042385), 2024-02-17
Supplement: s1 [file s1]

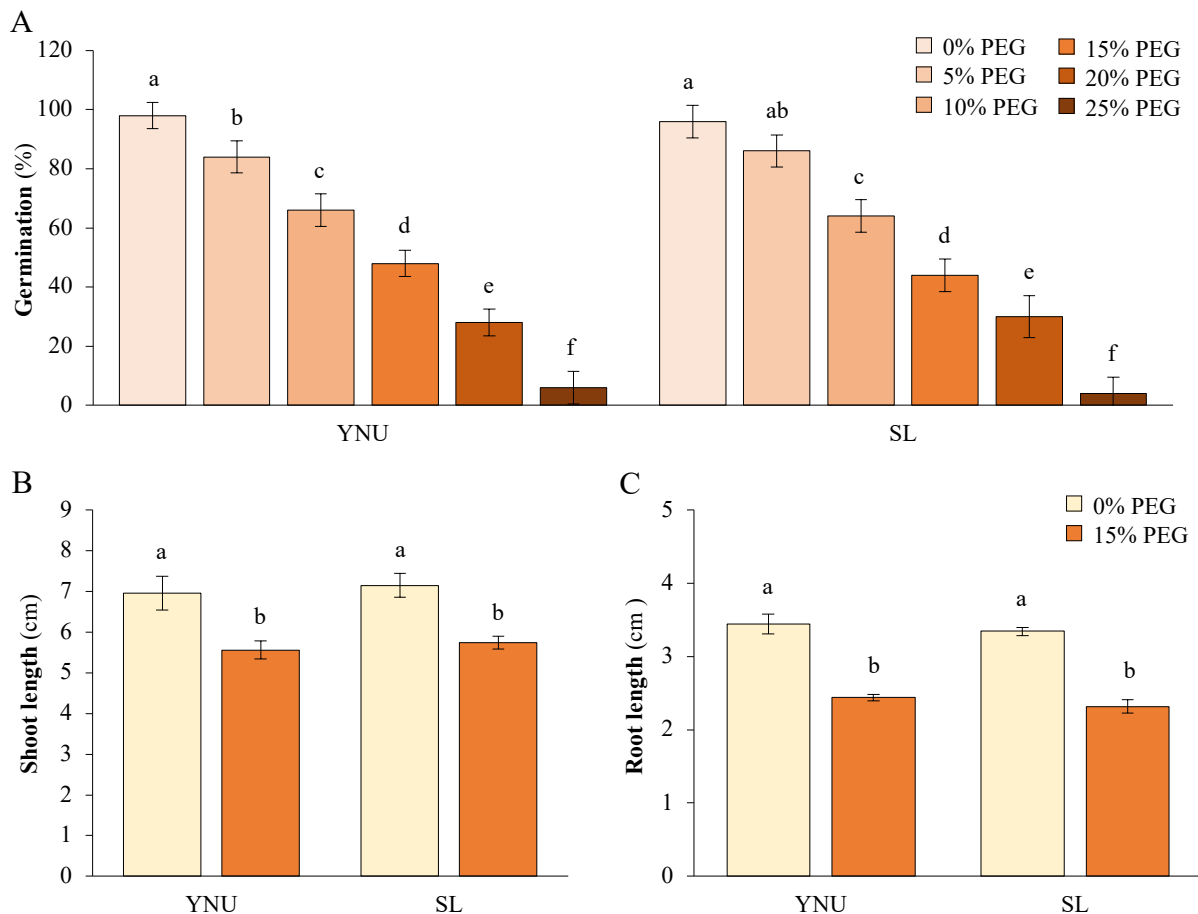

**Figure S3.** Drought stress determination. **(A)** Determination of LD<sub>50</sub> germination for 3 days drought tolerance (PEG6000), **(B)** shoot length under 0 and 15% PEG, **(C)** root length under 0 and 15% PEG for 7 days in YNU and SL rice genotypes. Means ( $\pm$  standard deviation) within the same graph followed by different letters are significantly different at  $p < 0.05$  according to the Tukey HSD test from three to five independent biological replicates ( $n=5$ ).
