# Supplementary material for: The Promising B−Type Response Regulator hst1 Gene Provides Multiple High Temperature and Drought Stress Tolerance in Rice
Source: MDPI journal article supplement (doi:10.3390/ijms25042385), 2024-02-17
Supplement: s1 [file s1]

**Table S1.** Sequence list of primers used in RT-PCR analysis

| Gene name and ID                              | Primer name         | Sequence               |
|-----------------------------------------------|---------------------|------------------------|
| <b><i>OsRR22 – hst1</i></b><br>(Os06g0183100) | <i>OsRR22</i> Ex2–F | CAGGCTATTACTGCGTTGAAG  |
|                                               | <i>OsRR22</i> Ex2–R | GGAGCTTAAATCCGTCCATGT  |
|                                               | <i>OsRR22</i> Ex5–F | CTTTCGGACTTCAGGAGCTTG  |
|                                               | <i>OsRR22</i> Ex5–R | TCTGTTGAAGCTGAGGTTGC   |
| <b><i>OsCERK1</i></b><br>(Os08g0538300)       | <i>OsCERK1</i> –F   | CAACATGGCGGATCTCTTCG   |
|                                               | <i>OsCERK1</i> –R   | GGACATCTGGAAGGGGAAGG   |
| <b><i>OsHK3</i></b><br>(Os01g0923700)         | <i>OsHK3</i> –F     | CATGTCAGCGTGCTCAACTT   |
|                                               | <i>OsHK3</i> –R     | GATGACGTTATTGCCAGCCA   |
| <b><i>OsHPI</i></b><br>(Os08g0557700)         | <i>OsHPI</i> –F     | GAGGTCGTCACGCTCTTCT    |
|                                               | <i>OsHPI</i> –R     | ACGAGTCCACCCTGTCAAAA   |
| <b><i>OsRR1</i></b><br>(Os04g0442300)         | <i>OsRR1</i> –F     | CTGAAGCCGATCCCAGTGA    |
|                                               | <i>OsRR1</i> –R     | TGCTTTGAAGAGGCTTTACGA  |
| <b><i>OsRR6</i></b><br>(Os04g0673300)         | <i>OsRR6</i> –F     | ATCACCGACTACTGGATGCC   |
|                                               | <i>OsRR6</i> –R     | TCTCCGACGACATGATCACC   |
| <b><i>OsCKX2</i></b><br>(Os01g0197700)        | <i>OsCKX2</i> –F    | CCGTCCTCATCTACCCCATG   |
|                                               | <i>OsCKX2</i> –R    | ATCTCGTCGTTCTGCTCCTC   |
| <b><i>OsABA1</i></b><br>(Os04g0448900)        | <i>OsABA1</i> –F    | GATACAGATCCAGAGCAACGC  |
|                                               | <i>OsABA1</i> –R    | ATAGCATCATCACCAACCGC   |
| <b><i>OsAKT1</i></b><br>(Os01g0648000)        | <i>OsAKT1</i> –F    | ATCCTTGTGCCAGTTGTTGC   |
|                                               | <i>OsAKT1</i> –R    | TCCTTTACGACACCAGCCAT   |
| <b><i>OsEXPA10</i></b><br>(Os04g0583500)      | <i>OsEXPA10</i> –F  | AACCACCATTTCTCTCTCCC   |
|                                               | <i>OsEXPA10</i> –R  | AGGACTGTCAGGAAGAAGCT   |
| <b><i>OsIAA1</i></b><br>(Os01g0178500)        | <i>OsIAA1</i> –F    | GGTGAGGTCGTTCAAGGAAGA  |
|                                               | <i>OsIAA1</i> –R    | CGGATGGTGAAGTGGGAGAA   |
| <b><i>OsACO1</i></b><br>(Os09g0451000)        | <i>OsACO1</i> –F    | GGCAGCATTGTCGTTCCC     |
|                                               | <i>OsACO1</i> –R    | TTCTCCACCTCGTCCATCAG   |
| <b><i>OsGRAS29</i></b><br>(Os05g0398800)      | <i>OsGRAS29</i> –F  | TGGAGTTTCTGGAGAGAGGC   |
|                                               | <i>OsGRAS29</i> –R  | GTTGGACGCCGTGAAGCC     |
| <b><i>OsMADS1</i></b><br>(Os03g0215400)       | <i>OsMADS1</i> –F   | ACAGGAAACCAGTGCAGAGA   |
|                                               | <i>OsMADS1</i> –R   | GTCTGCTGCTTCATTGCTCA   |
| <b><i>OsHHLH056</i></b><br>(Os01g0952800)     | <i>OsHHLH056</i> –F | GCGGGTTCAGTTCTTCCTCT   |
|                                               | <i>OsHHLH056</i> –R | GCTTTGCTTTGTTCTCTGACG  |
| <b><i>OsSALT</i></b><br>(Os01g0348900)        | <i>OsSALT</i> –F    | CGGTGTGGATGGACAGGAAT   |
|                                               | <i>OsSALT</i> –R    | GGACTCCAGCCTCGTATGTA   |
| <b><i>OsMSD1</i></b><br>(Os05g0323900)        | <i>OsMSD1</i> –F    | AGGTGCTGCTTTACAAGGA    |
|                                               | <i>OsMSD1</i> –R    | CCCAACAAAGGAACCAAGTT   |
| <b><i>OsHSP20</i></b><br>(Os03g0267000)       | <i>OsHSP20</i> –F   | AGGTGCTGCTTTACAAGGA    |
|                                               | <i>OsHSP20</i> –R   | CCCAACAAAGGAACCAAGTT   |
| <b><i>18S rRNA</i></b><br>(AF069218)          | <i>18S rRNA</i> –F  | GTGGTGACGGGTGACGGAGAAT |
|                                               | <i>18S rRNA</i> –R  | CGCCTGCTGCCTTCCTTGG    |
