# Supplementary material for: The Promising B−Type Response Regulator hst1 Gene Provides Multiple High Temperature and Drought Stress Tolerance in Rice
Source: MDPI journal article supplement (doi:10.3390/ijms25042385), 2024-02-17
Supplement: s1 [file s1]

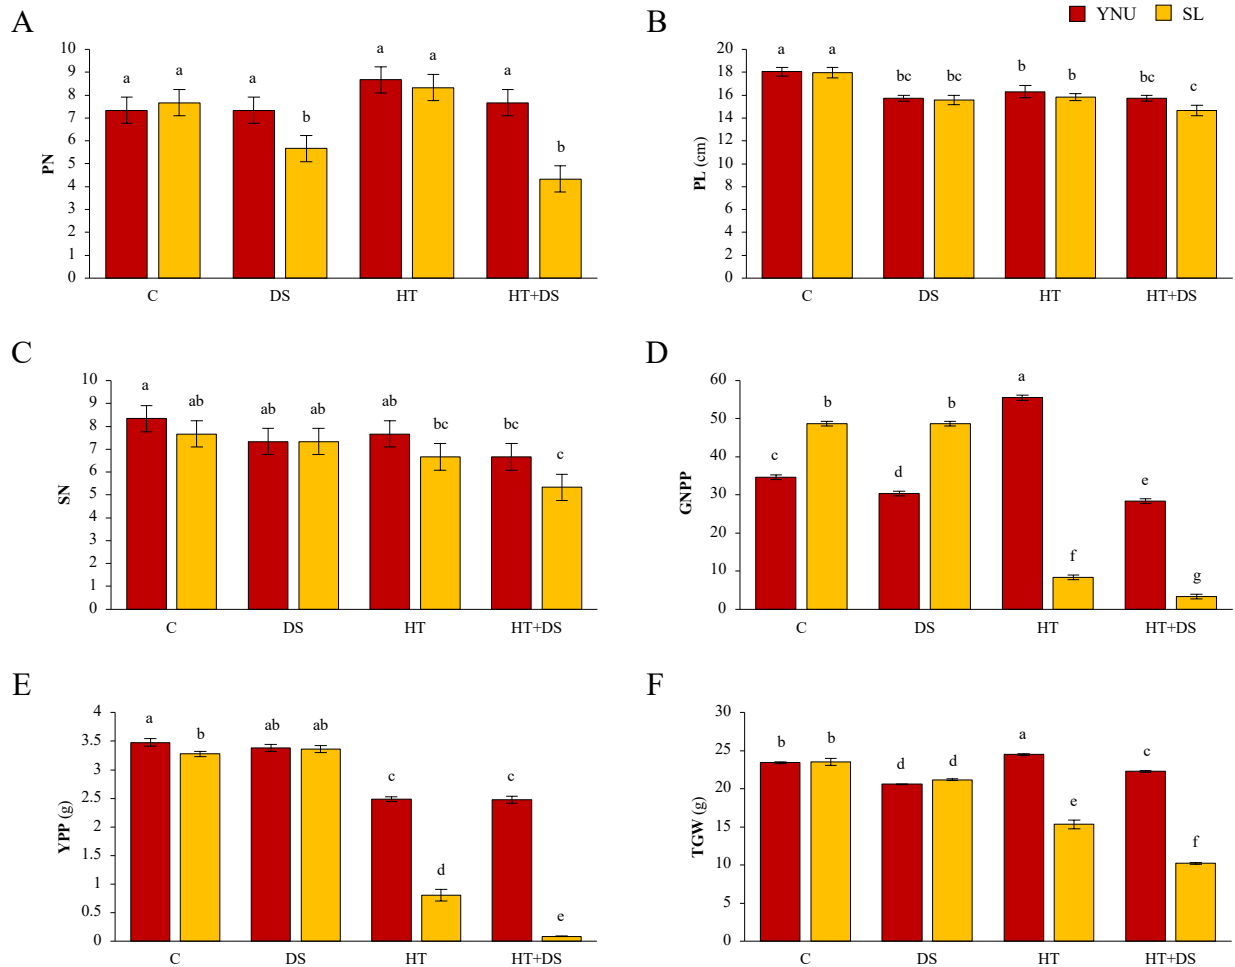

**Figure S9.** The effect of stresses on the harvest traits of YNU and SL genotypes at the reproductive stage. **(A)** panicle number (PN), **(B)** panicle length (PL), **(C)** spikelet number (SN), **(D)** grain number per panicle (GNPP), **(E)** yield per plant (YPP), **(F)** 1000-grain weights (TGW) of control (C; 28-30 °C + 70% PEG), drought (DS; 26/23 °C + 15% PEG), high temperature (HT; 35/32 °C + 0% PEG), and high temperature + drought (HT+DS; 35/32 °C + 15% PEG) stress exposed YNU and SL genotypes. Means ( $\pm$  standard deviation) within the same graph followed by different letters are significantly different at  $p < 0.05$  according to the Tukey HSD test from three independent biological replicates (n=3).
