# Supplementary material for: The Promising B−Type Response Regulator hst1 Gene Provides Multiple High Temperature and Drought Stress Tolerance in Rice
Source: Int J Mol Sci. 2024 Feb 17;25(4):2385. doi: 10.3390/ijms25042385 (PMC10889171; doi:10.3390/ijms25042385)
Supplement: Supplementary file 1 [file ijms-25-02385-s001.zip › Table S2.xlsx]

## Sheet: Sheet1
SL								E_S								APX_S								PL								APX_R								DiG								OsCERK1
	Df	Sum Sq	Mean Sq	F value	Pr(>F)				Df	Sum Sq	Mean Sq	F value	Pr(>F)				Df	Sum Sq	Mean Sq	F value	Pr(>F)				Df	Sum Sq	Mean Sq	F value	Pr(>F)				Df	Sum Sq	Mean Sq	F value	Pr(>F)				Df	Sum Sq	Mean Sq	F value	Pr(>F)				Df
Genotype (G)	1	196.3	196.3	504.08	1.6e-13	***		Genotype (G)	1	638.6	638.6	3565.06	< 2e-16	***		Genotype (G)	1	0.08532	0.08532	103.953	2.1e-08	***		Genotype (G)	1	8.64	8.64	56.043	1.3e-06	***		Genotype (G)	1	0.9714	0.9714	285.214	1.28e-11	***		Genotype (G)	1	63.37	63.37	190.125	2.68e-10	***		Genotype (G)	1
Temperature (T)	1	381	381	978.724	8.86e-16	***		Temperature (T)	1	28.4	28.4	158.354	1.03e-09	***		Temperature (T)	1	0.00479	0.00479	5.834	0.02805	*		Temperature (T)	1	15.682	15.682	101.719	2.44e-08	***		Temperature (T)	1	0.0183	0.0183	5.365	0.03413	*		Temperature (T)	1	117.04	117.04	351.125	2.61e-12	***		Temperature (T)	1
Drought (D)	1	0.5	0.5	1.259	0.278	ns		Drought (D)	1	80.7	80.7	450.454	3.82e-13	***		Drought (D)	1	0.00413	0.00413	5.037	0.03931	*		Drought (D)	1	1.215	1.215	7.881	0.012649	*		Drought (D)	1	0.7835	0.7835	230.044	6.47e-11	***		Drought (D)	1	22.04	22.04	66.125	4.48e-07	***		Drought (D)	1
G x T	1	52.9	52.9	135.864	3.13e-09	***		G x T	1	0.5	0.5	2.966	0.1043	ns		G x T	1	0.239	0.239	291.184	1.09e-11	***		G x T	1	3.375	3.375	21.892	0.000252	***		G x T	1	0.065	0.065	19.078	0.000478	***		G x T	1	30.37	30.37	91.125	5.22e-08	***		G x T	1
T x D	1	17.3	17.3	44.407	5.44e-06	***		T x D	1	1	1	5.818	0.0282	*		T x D	1	0.04043	0.04043	49.253	2.9e-06	***		T x D	1	0.167	0.167	1.081	0.313914	ns		T x D	1	0.0481	0.0481	14.114	0.001723	**		T x D	1	15.04	15.04	45.125	4.94e-06	***		T x D	1
G x D	1	71.5	71.5	183.697	3.46e-10	***		G x D	1	106.4	106.4	594.296	4.43e-14	***		G x D	1	0.00886	0.00886	10.788	0.00467	**		G x D	1	0.602	0.602	3.903	0.065718	.		G x D	1	0.0625	0.0625	18.353	0.000569	***		G x D	1	0.38	0.38	1.125	0.30459	ns		G x D	1
G x T x D	1	153.9	153.9	395.23	1.05e-12	***		G x T x D	1	1.1	1.1	5.878	0.0275	*		G x T x D	1	0.00537	0.00537	6.543	0.02107	*		G x T x D	1	0.107	0.107	0.692	0.417764	ns		G x T x D	1	0.0009	0.0009	0.275	0.607457	ns		G x T x D	1	3.37	3.37	10.125	0.00579	**		G x T x D	1
Residuals	16	6.2	0.4					Residuals	16	2.9	0.2					Residuals	16	0.01313	0.00082					Residuals	16	2.467	0.154					Residuals	16	0.0545	0.0034					Residuals	16	5.33	0.33					Residuals	16
RL								GS_S								CAT_S								SN								CAT_R								DaG
	Df	Sum Sq	Mean Sq	F value	Pr(>F)				Df	Sum Sq	Mean Sq	F value	Pr(>F)				Df	Sum Sq	Mean Sq	F value	Pr(>F)				Df	Sum Sq	Mean Sq	F value	Pr(>F)				Df	Sum Sq	Mean Sq	F value	Pr(>F)				Df	Sum Sq	Mean Sq	F value	Pr(>F)				Df
Genotype (G)	1	13.53	13.53	273.035	1.78e-11	***		Genotype (G)	1	0.20522	0.20522	7774.2	2e-16	***		Genotype (G)	1	40.78	40.78	21.511	0.000274	***		Genotype (G)	1	8.64	8.64	56.043	1.3e-06	***		Genotype (G)	1	5.009	5.009	216.074	1.03e-10	***		Genotype (G)	1	0.37	0.37	1.125	0.304594	ns		Genotype (G)	1
Temperature (T)	1	0.866	0.866	17.484	0.000705	***		Temperature (T)	1	0.02222	0.02222	841.7	2.9e-15	***		Temperature (T)	1	0.63	0.63	0.334	0.571468	ns		Temperature (T)	1	15.682	15.682	101.719	2.44e-08	***		Temperature (T)	1	17.579	17.579	758.308	6.59e-15	***		Temperature (T)	1	35.04	35.04	105.125	1.94e-08	***		Temperature (T)	1
Drought (D)	1	0.564	0.564	11.387	0.003863	**		Drought (D)	1	0.02074	0.02074	785.6	4.99e-15	***		Drought (D)	1	1.39	1.39	0.735	0.403898	ns		Drought (D)	1	1.215	1.215	7.881	0.012649	*		Drought (D)	1	1.954	1.954	84.293	8.9e-08	***		Drought (D)	1	12.04	12.04	36.125	1.82e-05	***		Drought (D)	1
G x T	1	4.018	4.018	81.083	1.16e-07	***		G x T	1	0.00311	0.00311	117.8	8.71e-09	***		G x T	1	0.64	0.64	0.337	0.569516	ns		G x T	1	3.375	3.375	21.892	0.000252	***		G x T	1	7.271	7.271	313.639	6.18e-12	***		G x T	1	1.04	1.04	3.125	0.096162	.		G x T	1
T x D	1	0.024	0.024	0.486	0.495869	ns		T x D	1	0.00048	0.00048	18	0.000621	***		T x D	1	1.13	1.13	0.598	0.450527	ns		T x D	1	0.167	0.167	1.081	0.313914	ns		T x D	1	0.246	0.246	10.613	0.00494	**		T x D	1	3.37	3.37	10.125	0.005793	**		T x D	1
G x D	1	0.001	0.001	0.016	0.899452	ns		G x D	1	0.04724	0.04724	1789.5	2e-16	***		G x D	1	2.23	2.23	1.177	0.294085	ns		G x D	1	0.602	0.602	3.903	0.065718	.		G x D	1	0.01	0.01	0.432	0.52016	ns		G x D	1	7.04	7.04	21.125	0.000298	***		G x D	1
G x T x D	1	1.984	1.984	40.032	1.01e-05	***		G x T x D	1	0.00548	0.00548	207.4	1.4e-10	***		G x T x D	1	4.47	4.47	2.358	0.144197	ns		G x T x D	1	0.107	0.107	0.692	0.417764	ns		G x T x D	1	0.05	0.05	2.168	0.16032	ns		G x T x D	1	18.37	18.37	55.125	1.44e-06	***		G x T x D	1
Residuals	16	0.793	0.05					Residuals	16	0.00042	3e-05					Residuals	16	30.33	1.9					Residuals	16	2.467	0.154					Residuals	16	0.371	0.023					Residuals	16	5.33	0.33					Residuals	16
SFW								Chla								H2O2_S								GNPP								H2O2_R								GWdt								OsGRAS29
	Df	Sum Sq	Mean Sq	F value	Pr(>F)				Df	Sum Sq	Mean Sq	F value	Pr(>F)				Df	Sum Sq	Mean Sq	F value	Pr(>F)				Df	Sum Sq	Mean Sq	F value	Pr(>F)				Df	Sum Sq	Mean Sq	F value	Pr(>F)				Df	Sum Sq	Mean Sq	F value	Pr(>F)				Df
Genotype (G)	1	0.02136	0.02136	179.69	4.07e-10	***		Genotype (G)	1	3.992	3.992	759.019	6.54e-15	***		Genotype (G)	1	4.79	4.79	14.194	0.00168	**		Genotype (G)	1	7.042	7.042	21.125	0.000298	***		Genotype (G)	1	139.52	139.52	114.97	1.03e-08	***		Genotype (G)	1	0.095	0.095	28.826	6.27e-05	***		Genotype (G)	1
Temperature (T)	1	0.09201	0.09201	773.991	5.61e-15	***		Temperature (T)	1	5.171	5.171	983.185	8.55e-16	***		Temperature (T)	1	149	149	441.699	4.45e-13	***		Temperature (T)	1	5.042	5.042	15.125	0.001303	**		Temperature (T)	1	6.02	6.02	4.96	0.040649	*		Temperature (T)	1	0.1926	0.1926	58.439	9.95e-07	***		Temperature (T)	1
Drought (D)	1	0.00052	0.00052	4.397	0.0523	ns		Drought (D)	1	9.609	9.609	1827.06	2e-16	***		Drought (D)	1	105.09	105.09	311.514	6.51e-12	***		Drought (D)	1	3.375	3.375	10.125	0.005793	**		Drought (D)	1	155.58	155.58	128.205	4.75e-09	***		Drought (D)	1	0.10534	0.1053	31.961	3.59e-05	***		Drought (D)	1
G x T	1	0.0001	0.0001	0.808	0.3822	ns		G x T	1	0.005	0.005	0.916	0.353	ns		G x T	1	81.11	81.11	240.434	4.64e-11	***		G x T	1	0.375	0.375	1.125	0.304594	ns		G x T	1	94.7	94.7	78.038	1.5e-07	***		G x T	1	0.0002	0.0002	0.062	0.80661	ns		G x T	1
T x D	1	0.00135	0.00135	11.356	0.0039	**		T x D	1	1.218	1.218	231.535	6.16e-11	***		T x D	1	1.41	1.41	4.184	0.05762	.		T x D	1	0.042	0.042	0.125	0.728289	ns		T x D	1	23.57	23.57	19.424	0.000441	***		T x D	1	0.0026	0.0026	0.79	0.38723	ns		T x D	1
G x D	1	0.00341	0.00341	28.67	6.45e-05	***		G x D	1	0.007	0.007	1.255	0.279	ns		G x D	1	0.74	0.74	2.2	0.15747	ns		G x D	1	1.042	1.042	3.125	0.096162	.		G x D	1	45.55	45.55	37.537	1.46e-05	***		G x D	1	0.033	0.033	10.014	0.00601	**		G x D	1
G x T x D	1	0.01961	0.01961	164.948	7.65e-10	***		G x T x D	1	0.328	0.328	62.379	6.55e-07	***		G x T x D	1	2.44	2.44	7.247	0.01603	*		G x T x D	1	0.375	0.375	1.125	0.304594	ns		G x T x D	1	2.5	2.5	2.062	0.170233	ns		G x T x D	1	0.0002	0.0002	0.062	0.80661	ns		G x T x D	1
Residuals	16	0.0019	0.00012					Residuals	16	0.084	0.005					Residuals	16	5.4	0.34					Residuals	16	5.333	0.333					Residuals	16	19.42	1.21					Residuals	16	0.05273	0.0033					Residuals	16
RFW								Chlb								PH_R								YPP								An_R								GL								OsMADS1
	Df	Sum Sq	Mean Sq	F value	Pr(>F)				Df	Sum Sq	Mean Sq	F value	Pr(>F)				Df	Sum Sq	Mean Sq	F value	Pr(>F)				Df	Sum Sq	Mean Sq	F value	Pr(>F)				Df	Sum Sq	Mean Sq	F value	Pr(>F)				Df	Sum Sq	Mean Sq	F value	Pr(>F)				Df
Genotype (G)	1	0.00348	0.00348	123.735	6.12e-09	***		Genotype (G)	1	3.533	3.533	1371.7	2e-16	***		Genotype (G)	1	3.01	3.01	4.419	0.051729	.		Genotype (G)	1	21.946	21.946	5938.02	2e-16	***		Genotype (G)	1	2	2	0.038	0.848785	ns		Genotype (G)	1	0.6017	0.6017	180.5	3.94e-10	***		Genotype (G)	1
Temperature (T)	1	0.006048	0.006048	215.053	1.07e-10	***		Temperature (T)	1	0	0	0.005	0.943	ns		Temperature (T)	1	148.5	148.5	217.987	9.69e-11	***		Temperature (T)	1	0.204	0.204	55.06	1.45e-06	***		Temperature (T)	1	266	266	4.112	0.059561	.		Temperature (T)	1	1.4017	1.4017	420.5	6.51e-13	***		Temperature (T)	1
Drought (D)	1	0.001335	0.001335	47.468	3.64e-06	***		Drought (D)	1	1.069	1.069	415.2	7.18e-13	***		Drought (D)	1	12.47	12.47	18.305	0.000576	***		Drought (D)	1	6.923	6.923	1873.19	2e-16	***		Drought (D)	1	5136	5136	79.308	1.34e-07	***		Drought (D)	1	0.375	0.375	112.5	1.2e-08	***		Drought (D)	1
G x T	1	0.000715	0.000715	25.424	0.00012	***		G x T	1	0.905	0.905	351.317	2.6e-12	***		G x T	1	85.5	85.5	125.51	5.53e-09	***		G x T	1	0.189	0.189	51.15	2.3e-06	***		G x T	1	3838	3838	59.265	9.1e-07	***		G x T	1	0.2017	0.2017	60.5	7.97e-07	***		G x T	1
T x D	1	0.003927	0.003927	139.628	2.57e-09	***		T x D	1	0.004	0.004	1.677	0.214	ns		T x D	1	5.51	5.51	8.089	0.011724	*		T x D	1	0.105	0.105	28.5	6.65e-05	***		T x D	1	22983	22983	354.895	2.4e-12	***		T x D	1	0.2017	0.2017	60.5	7.97e-07	***		T x D	1
G x D	1	6.3e-05	6.3e-05	2.253	0.152803	ns		G x D	1	0	0	0.114	0.74	ns		G x D	1	0	0	0.001	0.980575	ns		G x D	1	5.578	5.578	1509.19	2e-16	***		G x D	1	1556	1556	24.032	0.000159	***		G x D	1	0.2817	0.2817	84.5	8.75e-08	***		G x D	1
G x T x D	1	0.00061	0.00061	21.69	0.000263	***		G x T x D	1	0.103	0.103	40.183	9.84e-06	***		G x T x D	1	8.52	8.52	12.507	0.002743	**		G x T x D	1	0.297	0.297	80.37	1.23e-07	***		G x T x D	1	102	102	1.577	0.227183	ns		G x T x D	1	0.2017	0.2017	60.5	7.97e-07	***		G x T x D	1
Residuals	16	0.00045	2.8e-05					Residuals	16	0.041	0.003					Residuals	16	10.9	0.68					Residuals	16	0.059	0.004					Residuals	16	1036	65					Residuals	16	0.0533	0.0033					Residuals	16
SDW								ChlT								PN								TGW								E_R								GTh								OsbHLH056
	Df	Sum Sq	Mean Sq	F value	Pr(>F)				Df	Sum Sq	Mean Sq	F value	Pr(>F)				Df	Sum Sq	Mean Sq	F value	Pr(>F)				Df	Sum Sq	Mean Sq	F value	Pr(>F)				Df	Sum Sq	Mean Sq	F value	Pr(>F)				Df	Sum Sq	Mean Sq	F value	Pr(>F)				Df
Genotype (G)	1	0.0010935	0.0010935	230.211	6.43e-11	***		Genotype (G)	1	15.045	15.045	2534.97	2e-16	***		Genotype (G)	1	0.375	0.375	1.125	0.30459	ns		Genotype (G)	1	41442	41442	4520.93	2e-16	***		Genotype (G)	1	0.5557	0.5557	8266.26	2e-16	***		Genotype (G)	1	0.00184	0.00184	63	6.14e-07	***		Genotype (G)	1
Temperature (T)	1	0.0020167	0.0020167	424.561	6.04e-13	***		Temperature (T)	1	5.156	5.156	868.753	2.26e-15	***		Temperature (T)	1	18.375	18.375	55.125	1.44e-06	***		Temperature (T)	1	2831	2831	308.88	6.95e-12	***		Temperature (T)	1	0.0842	0.0842	1252.13	2e-16	***		Temperature (T)	1	0.0376	0.0376	1289.29	2e-16	***		Temperature (T)	1
Drought (D)	1	6.02e-05	6.02e-05	12.667	0.00262	**		Drought (D)	1	17.086	17.086	2878.88	2e-16	***		Drought (D)	1	9.375	9.375	28.125	7.14e-05	***		Drought (D)	1	3763	3763	410.51	7.83e-13	***		Drought (D)	1	0.0698	0.0698	1038.78	5.54e-16	***		Drought (D)	1	0.0176	0.0176	603.57	3.93e-14	***		Drought (D)	1
G x T	1	0.0001707	0.0001707	35.93	1.87e-05	***		G x T	1	0.778	0.778	131.143	4.04e-09	***		G x T	1	3.375	3.375	10.125	0.00579	**		G x T	1	1311	1311	142.98	2.17e-09	***		G x T	1	0.0001	0.0001	1.346	0.263	ns		G x T	1	0.00184	0.00184	63	6.14e-07	***		G x T	1
T x D	1	4.27e-05	4.27e-05	8.982	0.00853	**		T x D	1	1.368	1.368	230.507	6.37e-11	***		T x D	1	9.375	9.375	28.125	7.14e-05	***		T x D	1	2530	2530	276.01	1.64e-11	***		T x D	1	0.276	0.276	4105.69	2e-16	***		T x D	1	0.0012	0.0012	41.29	8.39e-06	***		T x D	1
G x D	1	3.75e-05	3.75e-05	7.895	0.01259	*		G x D	1	0.01	0.01	1.618	0.222	ns		G x D	1	2.042	2.042	6.125	0.0249	*		G x D	1	33795	33795	3686.72	2e-16	***		G x D	1	0.1865	0.1865	2774.82	2e-16	***		G x D	1	0.00634	0.00634	217.29	9.92e-11	***		G x D	1
G x T x D	1	0.0012327	0.0012327	259.509	2.61e-11	***		G x T x D	1	0.799	0.799	134.686	3.33e-09	***		G x T x D	1	0.375	0.375	1.125	0.30459	ns		G x T x D	1	544	544	59.38	8.98e-07	***		G x T x D	1	0.05	0.05	743.152	7.72e-15	***		G x T x D	1	0.0077	0.0077	264.14	2.28e-11	***		G x T x D	1
Residuals	16	7.6e-05	4.8e-06					Residuals	16	0.095	0.006					Residuals	16	5.333	0.333					Residuals	16	147	9					Residuals	16	0.0011	0.0001					Residuals	16	0.00047	3e-05					Residuals	16
RDW								MDA_S								RL_R								MDA_R								Gs_R								Gsa								OsRR1
	Df	Sum Sq	Mean Sq	F value	Pr(>F)				Df	Sum Sq	Mean Sq	F value	Pr(>F)				Df	Sum Sq	Mean Sq	F value	Pr(>F)				Df	Sum Sq	Mean Sq	F value	Pr(>F)				Df	Sum Sq	Mean Sq	F value	Pr(>F)				Df	Sum Sq	Mean Sq	F value	Pr(>F)				Df
Genotype (G)	1	2.04e-06	2.04e-06	2.722	0.11845	ns		Genotype (G)	1	28	28	19.75	0.000408	***		Genotype (G)	1	27.52	27.52	67.328	3.99e-07	***		Genotype (G)	1	208.42	208.42	236.664	5.23e-11	***		Genotype (G)	1	27.24	27.24	130.804	4.11e-09	***		Genotype (G)	1	0.38	0.38	10.018	0.006	**		Genotype (G)	1
Temperature (T)	1	3.038e-05	3.038e-05	40.5	9.39e-06	***		Temperature (T)	1	4407	4407	3073.81	2e-16	***		Temperature (T)	1	19.26	19.26	47.12	3.8e-06	***		Temperature (T)	1	4.09	4.09	4.641	0.0468	*		Temperature (T)	1	33.39	33.39	160.339	9.41e-10	***		Temperature (T)	1	4.524	4.524	119.262	7.96e-09	***		Temperature (T)	1
Drought (D)	1	5.704e-05	5.704e-05	76.056	1.78e-07	***		Drought (D)	1	1546	1546	1078.22	4.13e-16	***		Drought (D)	1	1.084	1.084	2.651	0.122988	ns		Drought (D)	1	69.97	69.97	79.456	1.33e-07	***		Drought (D)	1	62.18	62.18	298.545	9.01e-12	***		Drought (D)	1	2.053	2.053	54.13	1.61e-06	***		Drought (D)	1
G x T	1	1.204e-05	1.204e-05	16.056	0.00102	**		G x T	1	710	710	495.18	1.83e-13	***		G x T	1	9.5	9.5	23.243	0.000188	***		G x T	1	217.15	217.15	246.575	3.84e-11	***		G x T	1	26.36	26.36	126.542	5.22e-09	***		G x T	1	0.236	0.236	6.222	0.02394	*		G x T	1
T x D	1	4e-08	4e-08	0.056	0.81665	ns		T x D	1	45	45	31.68	3.77e-05	***		T x D	1	0.02	0.02	0.05	0.825981	ns		T x D	1	3.96	3.96	4.493	0.05	.		T x D	1	47.01	47.01	225.725	7.46e-11	***		T x D	1	0.534	0.534	14.078	0.00174	**		T x D	1
G x D	1	2.204e-05	2.204e-05	29.389	5.66e-05	***		G x D	1	69	69	48.21	3.31e-06	***		G x D	1	0.77	0.77	1.885	0.188725	ns		G x D	1	0.71	0.71	0.807	0.3822	ns		G x D	1	102.8	102.8	493.57	1.88e-13	***		G x D	1	0.476	0.476	12.549	0.00271	**		G x D	1
G x T x D	1	1.204e-05	1.204e-05	16.056	0.00102	**		G x T x D	1	155	155	108.13	1.59e-08	***		G x T x D	1	0.094	0.094	0.229	0.63848	ns		G x T x D	1	0.03	0.03	0.031	0.8618	ns		G x T x D	1	0.18	0.18	0.874	0.364	ns		G x T x D	1	0.244	0.244	6.433	0.022	*		G x T x D	1
Residuals	16	1.2e-05	7.5e-07					Residuals	16	23	1					Residuals	16	6.54	0.409					Residuals	16	14.09	0.88					Residuals	16	3.33	0.21					Residuals	16	0.607	0.038					Residuals	16
RWC								Pro_S								RB_R								Pro_R								PG								OsRR22ex2								OsRR6
	Df	Sum Sq	Mean Sq	F value	Pr(>F)				Df	Sum Sq	Mean Sq	F value	Pr(>F)				Df	Sum Sq	Mean Sq	F value	Pr(>F)				Df	Sum Sq	Mean Sq	F value	Pr(>F)				Df	Sum Sq	Mean Sq	F value	Pr(>F)				Df	Sum Sq	Mean Sq	F value	Pr(>F)				Df
Genotype (G)	1	2812	2812	338.516	3.45e-12	***		Genotype (G)	1	5.106	5.106	547.564	8.4e-14	***		Genotype (G)	1	6.94	6.94	20.208	0.000367	***		Genotype (G)	1	0.187	0.187	0.446	0.51391	ns		Genotype (G)	1	13.2	13.2	45.985	4.41e-06	***		Genotype (G)	1	1.06e-13	1.06e-13	24.6	0.000142	***		Genotype (G)	1
Temperature (T)	1	1526	1526	183.755	3.45e-10	***		Temperature (T)	1	1.22	1.22	130.778	4.12e-09	***		Temperature (T)	1	55.29	55.29	161.098	9.09e-10	***		Temperature (T)	1	30.579	30.579	72.801	2.38e-07	***		Temperature (T)	1	120.6	120.6	420.093	6.56e-13	***		Temperature (T)	1	1.32e-14	1.32e-14	3.07	0.098875	.		Temperature (T)	1
Drought (D)	1	3910	3910	470.801	2.71e-13	***		Drought (D)	1	0.001	0.001	0.129	0.724	ns		Drought (D)	1	0.76	0.76	2.222	0.155526	ns		Drought (D)	1	4.503	4.503	10.721	0.00477	**		Drought (D)	1	77.76	77.76	270.862	1.89e-11	***		Drought (D)	1	5.471e-13	5.471e-13	126.92	5.11e-09	***		Drought (D)	1
G x T	1	275	275	33.149	2.94e-05	***		G x T	1	0.029	0.029	3.078	0.0985	ns		G x T	1	2.71	2.71	7.902	0.012551	*		G x T	1	1.017	1.017	2.421	0.13925	ns		G x T	1	0	0	0.006	0.94021	ns		G x T	1	7.99e-14	7.99e-14	18.54	0.000545	***		G x T	1
T x D	1	181	181	21.806	0.000256	***		T x D	1	0.297	0.297	31.854	3.66e-05	***		T x D	1	0.67	0.67	1.962	0.180408	ns		T x D	1	15.148	15.148	36.064	1.83e-05	***		T x D	1	3.23	3.23	11.239	0.00405	**		T x D	1	1.417e-13	1.417e-13	32.88	3.08e-05	***		T x D	1
G x D	1	1356	1356	163.24	8.25e-10	***		G x D	1	1.921	1.921	206.006	1.48e-10	***		G x D	1	0.07	0.07	0.197	0.663064	ns		G x D	1	3.877	3.877	9.23	0.00783	**		G x D	1	3.53	3.53	12.284	0.00293	**		G x D	1	1.172e-13	1.172e-13	27.18	8.54e-05	***		G x D	1
G x T x D	1	11	11	1.289	0.272946	ns		G x T x D	1	0.004	0.004	0.429	0.5216	ns		G x T x D	1	1.11	1.11	3.247	0.090407	.		G x T x D	1	6.306	6.306	15.012	0.00134	**		G x T x D	1	35.53	35.53	123.75	6.12e-09	***		G x T x D	1	7.08e-14	7.08e-14	16.42	0.000926	***		G x T x D	1
Residuals	16	133	8					Residuals	16	0.149	0.009					Residuals	16	5.49	0.34					Residuals	16	6.721	0.42					Residuals	16	4.59	0.29					Residuals	16	6.9e-14	4.3e-15					Residuals	16
An_S								SOD_S								PB_R								SOD_R								CG								OsRR22ex5								OsCKX2
	Df	Sum Sq	Mean Sq	F value	Pr(>F)				Df	Sum Sq	Mean Sq	F value	Pr(>F)				Df	Sum Sq	Mean Sq	F value	Pr(>F)				Df	Sum Sq	Mean Sq	F value	Pr(>F)				Df	Sum Sq	Mean Sq	F value	Pr(>F)				Df	Sum Sq	Mean Sq	F value	Pr(>F)				Df
Genotype (G)	1	240	240	5.347	0.0344	*		Genotype (G)	1	266.5	266.5	1170.6	2e-16	***		Genotype (G)	1	115.77	115.77	394.131	1.07e-12	***		Genotype (G)	1	29.8	29.8	16.46	0.000914	***		Genotype (G)	1	26.882	26.882	724.899	9.38e-15	***		Genotype (G)	1	1.67e-12	1.67e-12	124.937	5.71e-09	***		Genotype (G)	1
Temperature (T)	1	150816	150816	3354.24	< 2e-16	***		Temperature (T)	1	371.7	371.7	1632.9	2e-16	***		Temperature (T)	1	118.03	118.03	401.825	9.24e-13	***		Temperature (T)	1	26.5	26.5	14.66	0.001481	**		Temperature (T)	1	1.402	1.402	37.798	1.4e-05	***		Temperature (T)	1	1.216e-12	1.216e-12	90.977	5.28e-08	***		Temperature (T)	1
Drought (D)	1	1372	1372	30.522	4.62e-05	***		Drought (D)	1	141.8	141.8	622.8	3.08e-14	***		Drought (D)	1	8.32	8.32	28.342	6.85e-05	***		Drought (D)	1	69.5	69.5	38.4	1.28e-05	***		Drought (D)	1	18.375	18.375	495.506	1.83e-13	***		Drought (D)	1	1.084e-12	1.084e-12	81.091	1.16e-07	***		Drought (D)	1
G x T	1	2512	2512	55.866	1.32e-06	***		G x T	1	57.8	57.8	253.7	3.09e-11	***		G x T	1	22.25	22.25	75.766	1.82e-07	***		G x T	1	162.7	162.7	89.91	5.73e-08	***		G x T	1	2.667	2.667	71.91	2.58e-07	***		G x T	1	3.258e-13	3.258e-13	24.37	0.000149	***		G x T	1
T x D	1	23367	23367	519.707	1.26e-13	***		T x D	1	1135.1	1135.1	4986.5	2e-16	***		T x D	1	0.02	0.02	0.063	0.804846	ns		T x D	1	1372.9	1372.9	758.65	6.57e-15	***		T x D	1	1.127	1.127	30.382	4.73e-05	***		T x D	1	1.028e-13	1.028e-13	7.692	0.013566	*		T x D	1
G x D	1	57626	57626	1281.63	< 2e-16	***		G x D	1	555.9	555.9	2442.3	2e-16	***		G x D	1	6.83	6.83	23.252	0.000188	***		G x D	1	151.2	151.2	83.53	9.46e-08	***		G x D	1	0.167	0.167	4.494	0.049991	*		G x D	1	2.593e-13	2.593e-13	19.391	0.000444	***		G x D	1
G x T x D	1	78	78	1.729	0.2071	ns		G x T x D	1	220.4	220.4	968.3	9.65e-16	***		G x T x D	1	6.02	6.02	20.492	0.000344	***		G x T x D	1	60.8	60.8	33.59	2.74e-05	***		G x T x D	1	0.602	0.602	16.225	0.000973	***		G x T x D	1	4.37e-13	4.37e-13	32.683	3.18e-05	***		G x T x D	1
Residuals	16	719	45					Residuals	16	3.6	0.2					Residuals	16	4.7	0.29					Residuals	16	29	1.8					Residuals	16	0.593	0.037					Residuals	16	2.139e-13	1.34e-14					Residuals	16
[truncated: 19 more columns]
